# Supplementary material for: Exceeding three-electron reactions in Na3+2xMn1+xTi1−x(PO4)3 NASICON cathodes with high energy density for sodium-ion batteries
Source: Royal Society of Chemistry journal article supplement (doi:10.1039/d1ta01148k), 2021-01-01
Supplement: d1ta01148k1.pdf [file d1ta01148k1.pdf]

1

Supporting Information

2 **Exceeding three-electron reactions in  $\text{Na}_{3+2x}\text{Mn}_{1+x}\text{Ti}_{1-x}(\text{PO}_4)_3$**

3 **NASICON Cathode with High Energy Density for Sodium-ion**

4 **Batteries**

5 Jiefei Liu<sup>1</sup>, Kangshou Lin<sup>1</sup>, Yu Zhao<sup>1</sup>, Yu Zhou<sup>1</sup>, Xianhua Hou<sup>1,2\*</sup>, Xiang Liu<sup>1,3</sup>,

6 Hongtao Lou<sup>4</sup>, Kwok-ho Lam<sup>5</sup>, Fuming Chen<sup>1\*</sup>

7

8 <sup>1</sup> Guangdong Provincial Key Laboratory of Quantum Engineering and Quantum  
9 Materials, Guangdong-Hong Kong Joint Laboratory of Quantum Matter, Guangdong  
10 Engineering Technology Research Center of Efficient Green Energy and Environment  
11 Protection Materials, School of Physics and Telecommunication Engineering, South  
12 China Normal University, Guangzhou 510006, China

13 <sup>2</sup> SCNU Qingyuan Institute of Science and Technology Innovation Co., Ltd.,  
14 Qingyuan 511517, China

15 <sup>3</sup> School of Energy Science and Engineering, Institute of Advanced Materials,  
16 Nanjing University of Technology, Nanjing 210009, China

17 <sup>4</sup> Guangdong Lingguang New Material Co., Ltd, Zhaoqing, 526108, China

18 <sup>5</sup> Department of Electrical Engineering, Hong Kong Polytechnic University,  
19 Hunghom, Kowloon, Hong Kong

20 E-mail addresses: [houxianhua@m.scnu.edu.cn](mailto:houxianhua@m.scnu.edu.cn); [fmchen@m.scnu.edu.cn](mailto:fmchen@m.scnu.edu.cn)

21

22

23

24

25

26

27

28

29

30 ~~Calculation of the theoretical capacity of  $\text{Na}_{3.4}\text{Mn}_{1.2}\text{Ti}_{0.8}(\text{PO}_4)_3$ :~~

1 The theoretical capacity is calculated using the formula:  $C = nF/3.6 M$  (mAh/g),<sup>1</sup> where  
2 n, F, and M represent the transfer electron number per mole material, Faraday  
3 constant and molecular weight. Specifically, the theoretical capacity of  $NM_{1.2}T_{0.8}P$   
4 can be obtained by the below process:  $(3.2 \text{ mol} * 96500 \text{ C/mol}) / (467.3 \text{ g/mol} * 3.6$   
5  $\text{ C/mAh}) = 183.56 \text{ mAh g}^{-1}$ .

6 Calculation of the average voltage:  $V = E/C$ , E and C represent energy density and  
7 capacity, respectively. Both data of E and C can read from the Battery LAND  
8 CT2001A battery testing system.

9

#### 10 **Preparation of Full cell and electrochemical test.**

11 The hard carbon (HC) anode was directly purchased from BTR New Energy Materials  
12 Inc. The HC anode was cycled for 5 cycles at 100 mA  $\text{g}^{-1}$  in 1M  $\text{NaClO}_4$  dissolved  
13 EC/DMC with 5%FEC electrolyte. Then the HC anodes were disassembled in a  
14 glovebox filled with argon and matched with  $NM_{1.2}T_{0.8}P$  cathode 1M  $\text{NaClO}_4$   
15 dissolved EC/DMC with 5%FEC electrolyte with close to capacity. The  $NM_{1.2}T_{0.8}P$   
16 //HC full cell was measured with the voltage window of 0.5-4.2V.

17

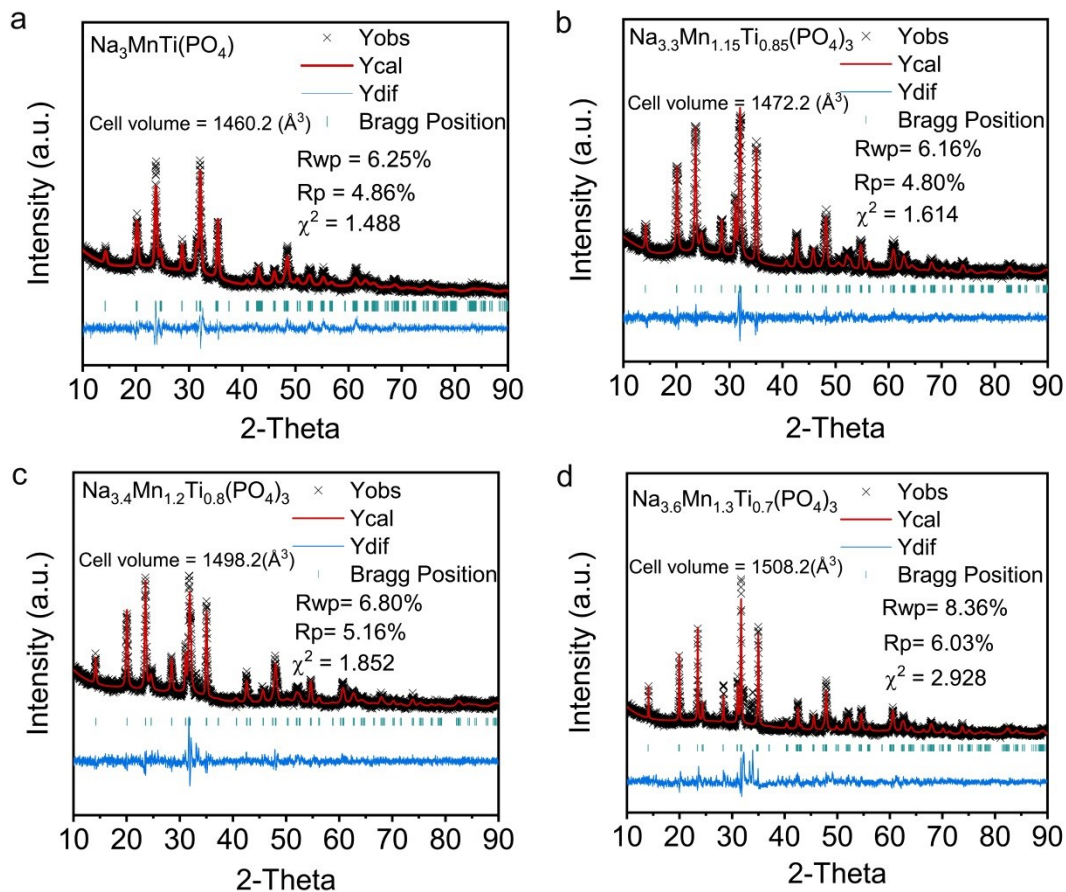

1  
 2 **Figure S1.** Rietveld refinement of XRD pattern: (a) NMTP. (b)  $\text{NM}_{1.15}\text{T}_{0.85}\text{P}$ . (c)  
 3  $\text{NM}_{1.2}\text{T}_{0.8}\text{P}$ . (d)  $\text{NM}_{1.3}\text{T}_{0.7}\text{P}$ .

4  
 5

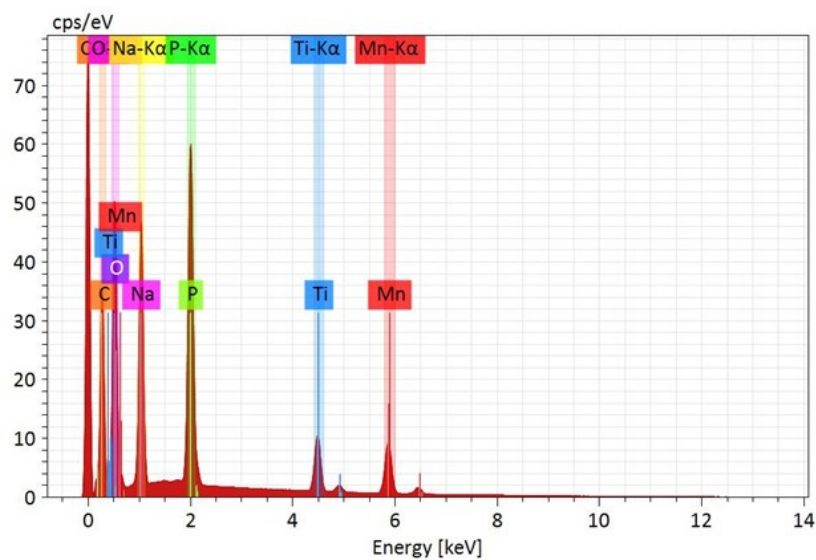

6  
 7 **Figure S2.** The EDS spectrum of  $\text{NM}_{1.2}\text{T}_{0.8}\text{P}$ .

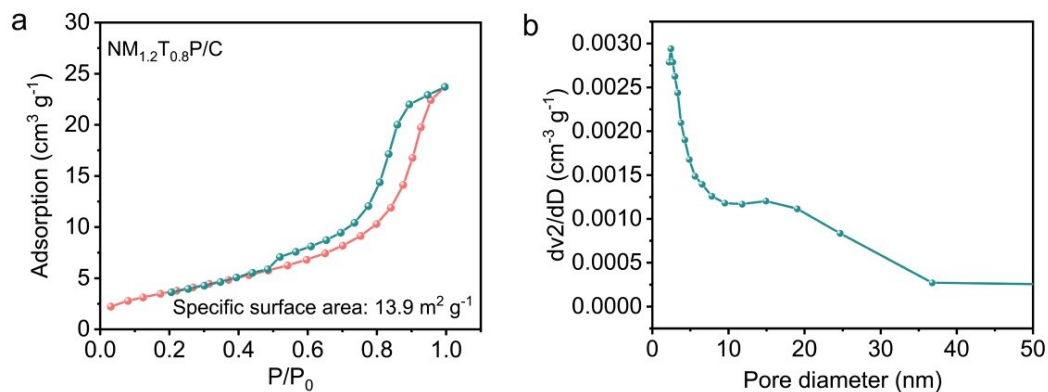

1

2 **Figure S3.** (a) The  $N_2$  absorption-desorption isotherms of  $NM_{1.2}T_{0.8}P$ . (b) The  
3 corresponding pore size distribution curves.

4

5

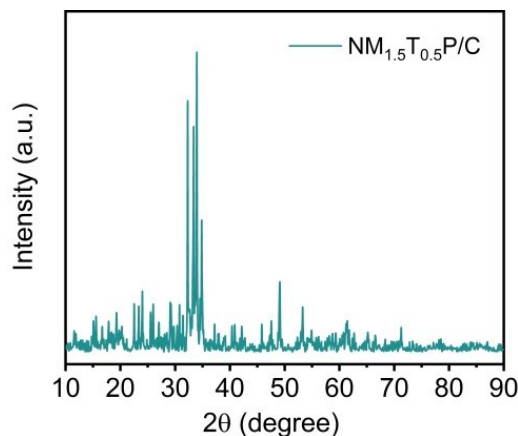

6

7 **Figure S4.** The XRD pattern of  $NM_{1.5}T_{0.5}P$  sample.

8

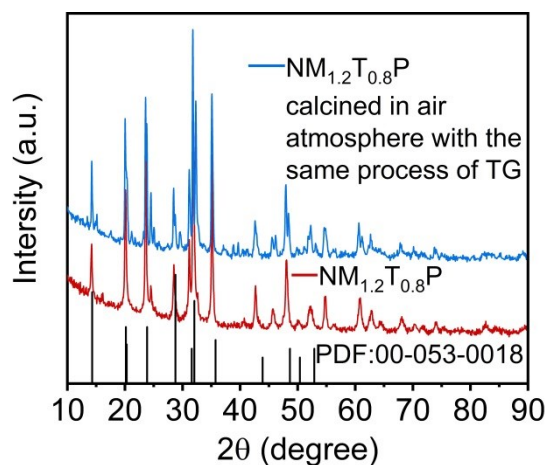

9

10 **Figure S5.** The XRD patterns of  $NM_{1.2}T_{0.8}P$  and  $NM_{1.2}T_{0.8}P$  calcined in air with the  
11 same heating process of TG.

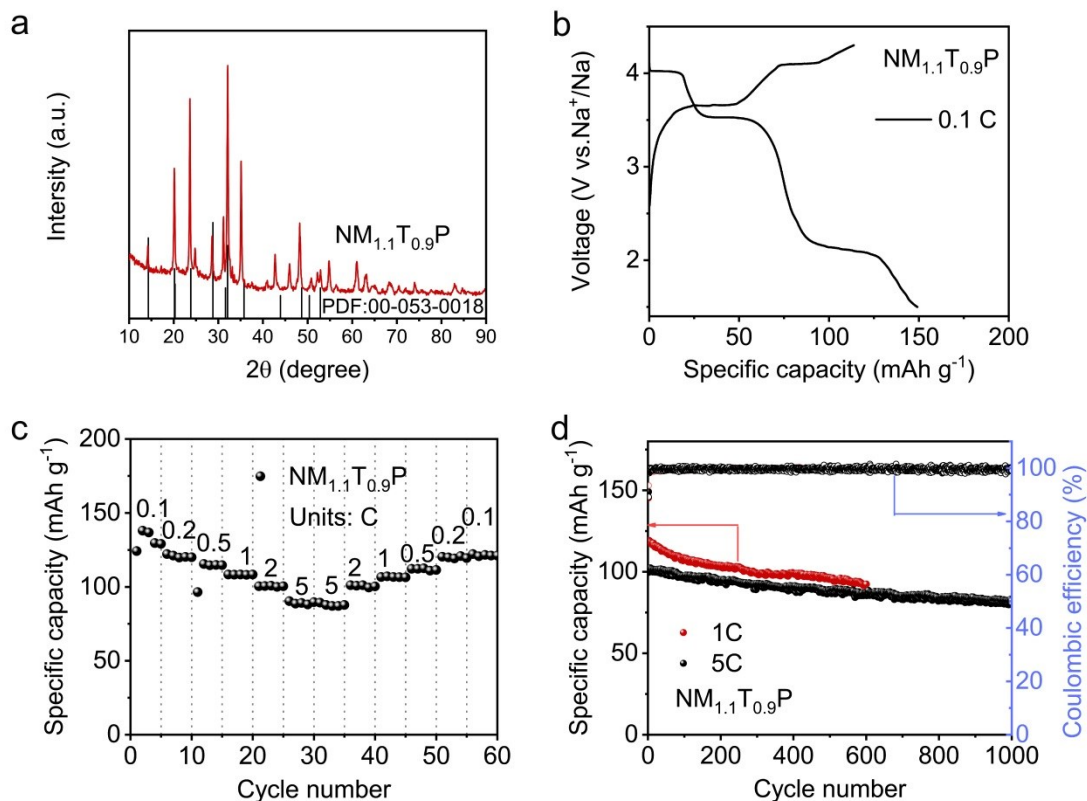

1

2 **Figure S6.** (a) The XRD pattern of  $\text{NM}_{1.1}\text{T}_{0.9}\text{P}$ . (b) The charge/discharge profile of  
 3  $\text{NM}_{1.1}\text{T}_{0.9}\text{P}$  at 0.1C. (c) The rate performance of  $\text{NM}_{1.1}\text{T}_{0.9}\text{P}$ . (d) The long cycling  
 4 performance of  $\text{NM}_{1.1}\text{T}_{0.9}\text{P}$  at 1C and 5C.

5 The prepared  $\text{NM}_{1.1}\text{T}_{0.9}\text{P}$  sample possesses a typical NASICON structure, which can  
 6 deliver a highest capacity of  $149.1 \text{ mAh g}^{-1}$  at 0.1C. The  $\text{NM}_{1.1}\text{T}_{0.9}\text{P}$  exhibits a  
 7 superior cycling stability, which can deliver a reversible capacity of  $119 \text{ mAh g}^{-1}$  at  
 8 1C and retain 81% capacity retention after 500 cycles. Even at large current of 5C, the  
 9  $\text{NM}_{1.1}\text{T}_{0.9}\text{P}$  can still deliver a reversible capacity of  $100.2 \text{ mAh g}^{-1}$  with the 81.5%  
 10 capacity retention after 1000 cycles.

11

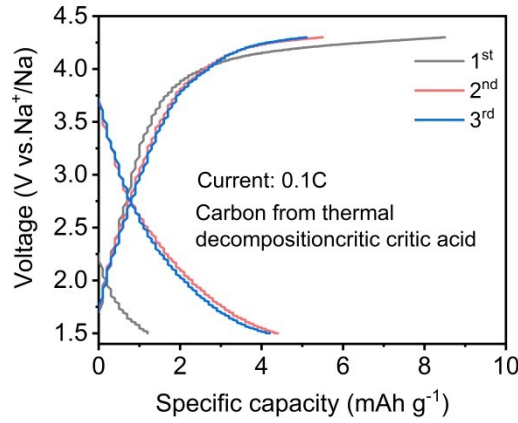

1

2 **Figure S7.** The charge/discharge profiles of carbon derived from critic acid at 15mA  
3  $\text{g}^{-1}$  within the voltage window of 1.5-4.3V.

4 Within the voltage window of 1.5 to 4.3V, the carbon derived from critic acid can  
5 only deliver a reversible capacity of 4  $\text{mAh g}^{-1}$  at 0.1C (Fig. S7). Therefore, the  
6 capacity contribution of carbon in  $\text{NM}_{1.2}\text{T}_{0.8}\text{P}$  compounds can be negligible.

7

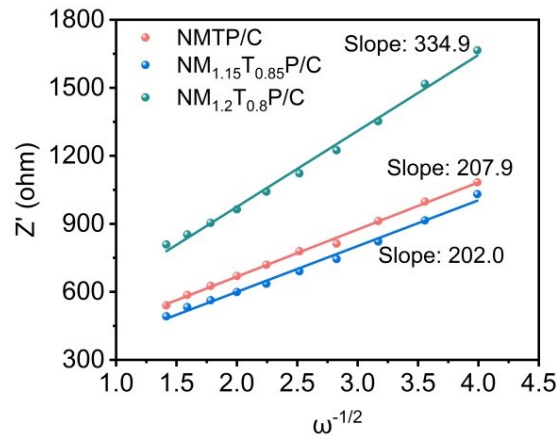

8

9 **Figure S8.** The linear relationships between  $Z'$  and reciprocal square root of angular  
10 rate ( $\omega^{-1/2}$ ) in the low-frequency region.

11 For EIS, the diffusion coefficient of  $\text{Na}^+$  can be calculated with this equation:  $D_{\text{Na}^+} =$   
12  $\frac{R^2 T^2}{2 A^2 n^2 F^4 C^2 \sigma^2}$ . Where  $R$  is gas constant,  $T$  is the absolute temperature,  $F$  is  
13 Faraday constant,  $A$  is surficial area of the electrode,  $n$  is the number of transferred  
14 electrons,  $C$  is the concentration of  $\text{Na}^+$  in the lattice, and  $\sigma$  is the Warburg factor and  
15 can be obtained from the line of  $Z' \sim \omega^{-1/2}$ . Because the  $\text{NM}_{1.15}\text{T}_{0.85}\text{P}$  possesses the  
16 smallest  $\sigma$  value and the  $\sigma$  value of  $\text{NM}_{1.2}\text{T}_{0.8}\text{P}$  is largest,  $D_{\text{Na}^+}$  of  $\text{NM}_{1.15}\text{T}_{0.85}\text{P}$  is  
17 largest and  $D_{\text{Na}^+}$  of  $\text{NM}_{1.2}\text{T}_{0.8}\text{P}$  is smallest.

1

2

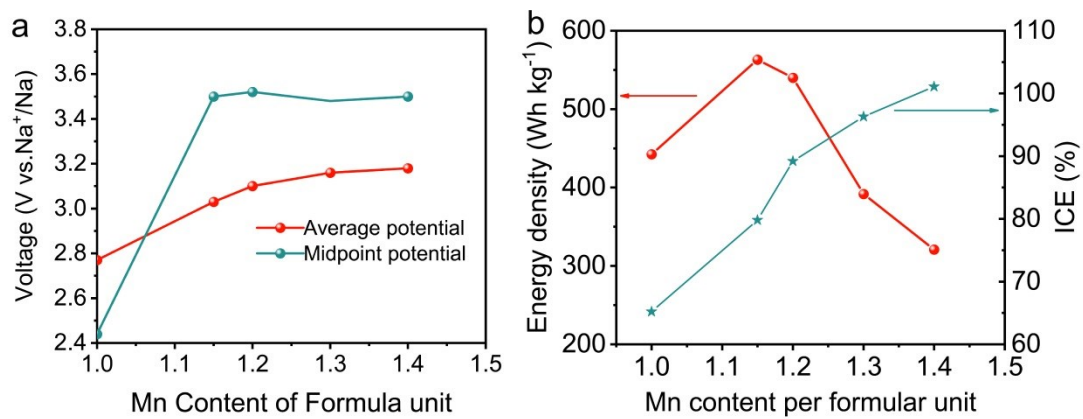

3

4 **Figure S9.** (a) The midpoint potential and average potential of  $N_{3+2x}M_{1+x}T_{1-x}P$  at 0.1  
5 C. (b) The corresponding energy density and initial coulombic efficiency.

6

7

8

9

10

11

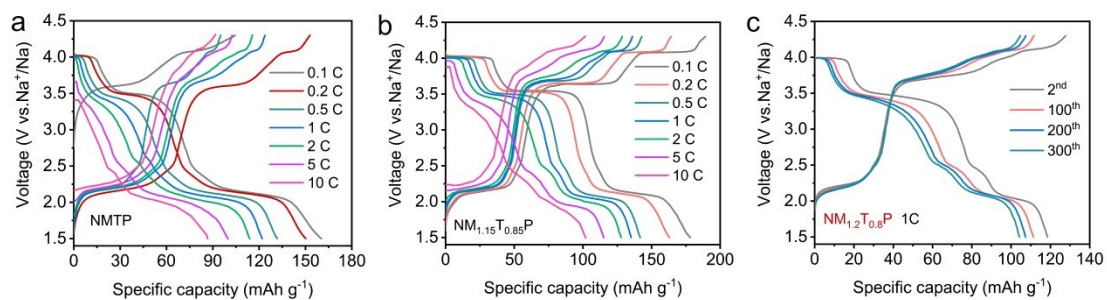

12

13 **Figure S10.** (a) The rate charge/discharge curves of NMTP. (b) The rate  
14 charge/discharge curves of NM<sub>1.15</sub>T<sub>0.85</sub>P. (c) The charge/discharge curves of  
15 NM<sub>1.2</sub>T<sub>0.8</sub>P at 1 C after 100, 200, and 300 cycles.

16

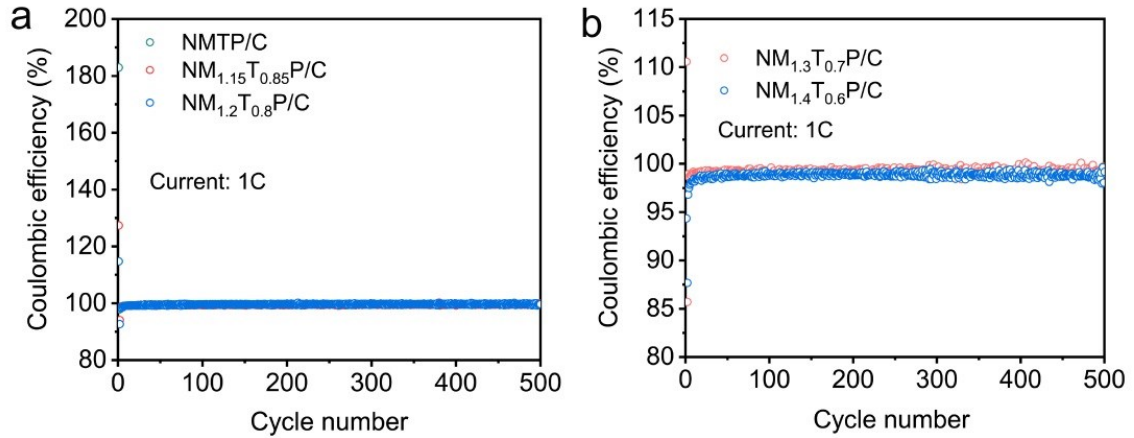

1

2 **Figure S11.** (a) The corresponding coulombic efficiency of NMTP,  $NM_{1.15}T_{0.85}P$ , and  
 3  $NM_{1.2}T_{0.8}P$  at 1 C. (b) The corresponding coulombic efficiency of  $NM_{1.3}T_{0.7}P$ , and  
 4  $NM_{1.4}T_{0.6}P$  at 1 C.

5

6

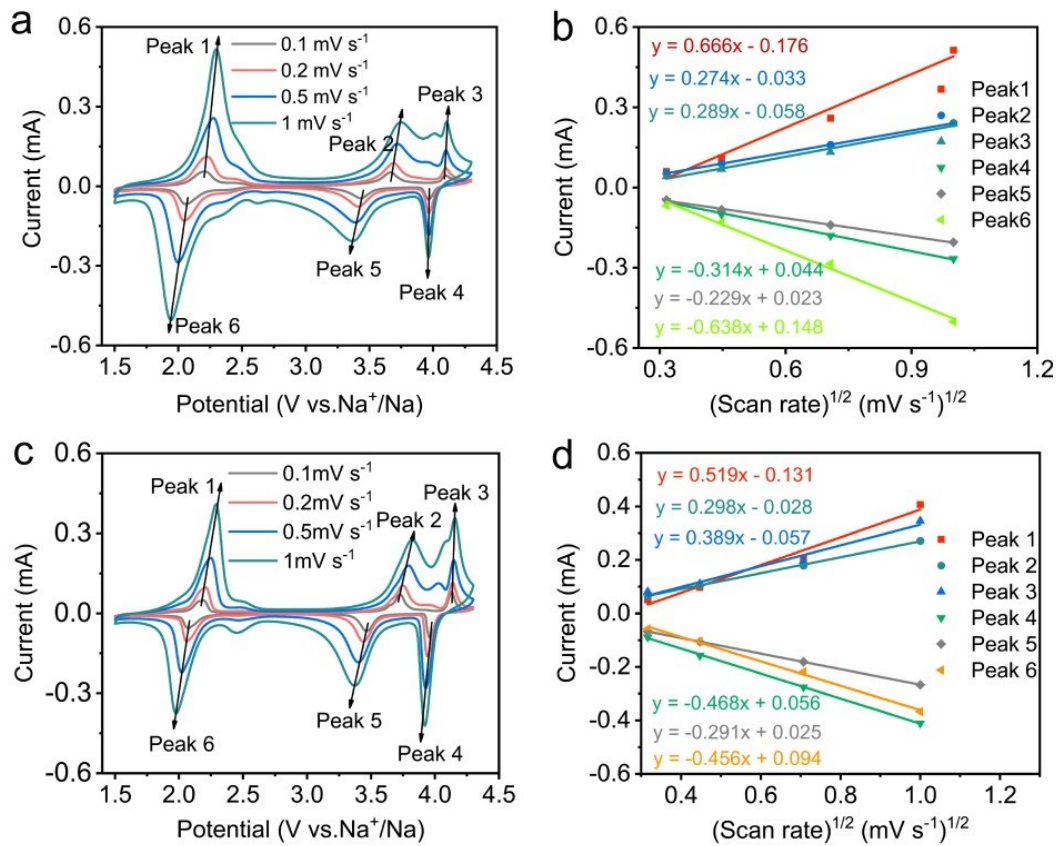

7

8 **Figure S12.** (a) CV curves of NMTP cathode under different scan rates. (b) The  
 9 corresponding linear relationships between  $I_p$  and  $v^{1/2}$  of different redox peaks. (c) CV  
 10 curves of  $NM_{1.15}T_{0.85}P$  cathode under different scan rates. (d) The corresponding  
 11 linear relationships between  $I_p$  and  $v^{1/2}$  of different redox peaks.



1

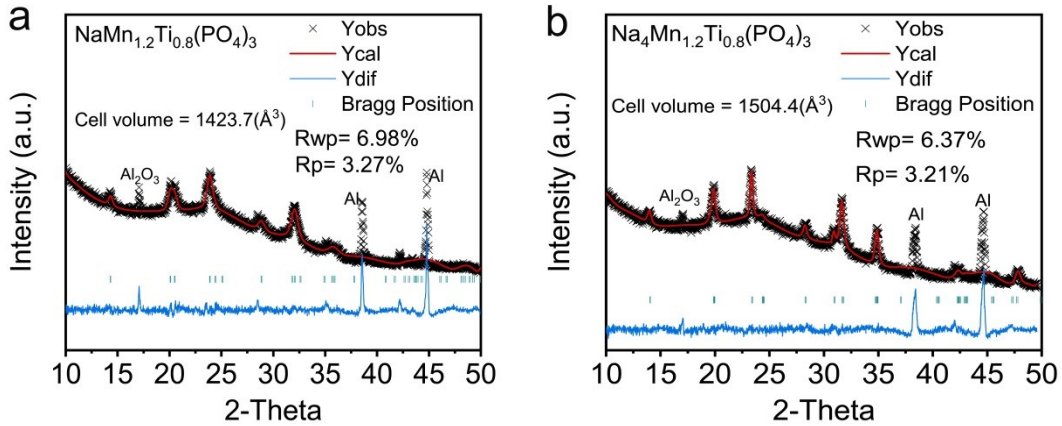

2

3 **Figure S13.** (a) The Rietveld refinement for XRD pattern of  $\text{NM}_{1.2}\text{T}_{0.8}\text{P}$  charged to  
4 4.3V. (b) The Rietveld refinement for XRD pattern of  $\text{NM}_{1.2}\text{T}_{0.8}\text{P}$  discharged to 1.5V.

5

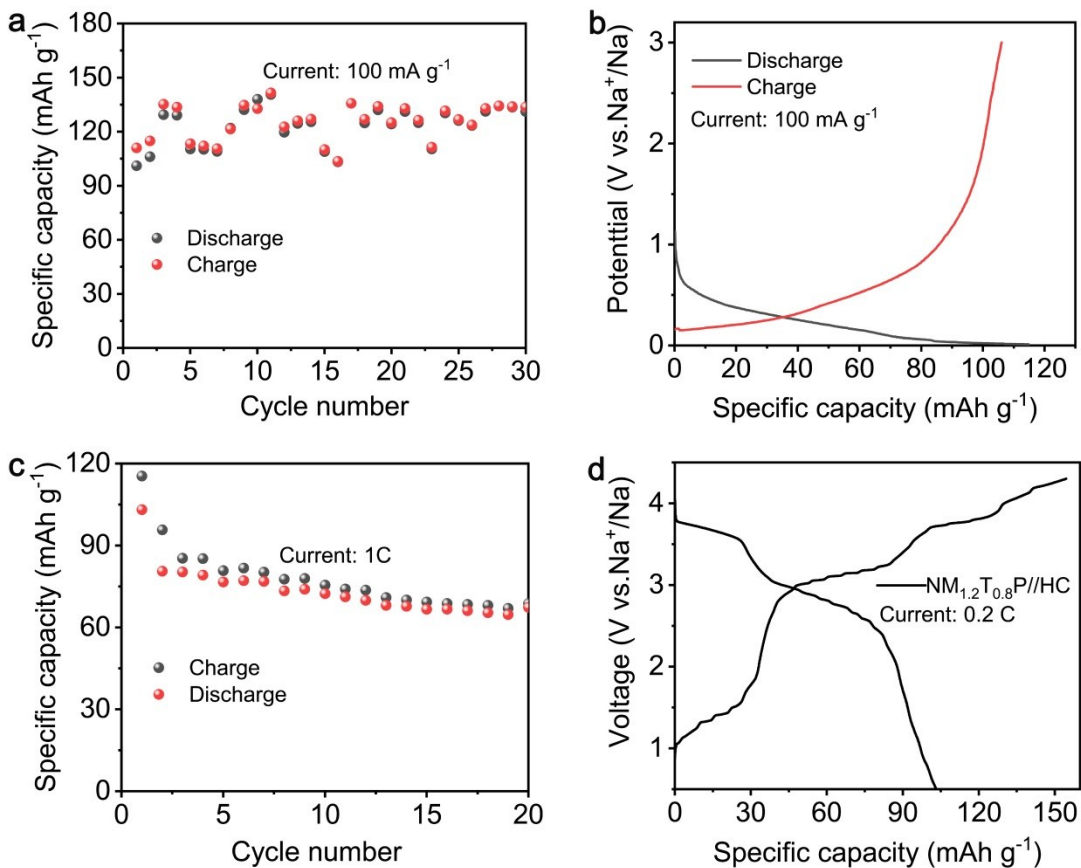

6

7 **Figure S14.** (a) The cycling performance of hard carbon anode at  $100 \text{ mA g}^{-1}$ . (b) The  
8 charge/discharge profiles of hard carbon anode at  $100 \text{ mA g}^{-1}$ . (c) The cycling  
9 performance of  $\text{NM}_{1.2}\text{T}_{0.8}\text{P}/\text{HC}$  full cell at 1C ( $150 \text{ mA g}^{-1}$ ). (d) The charge/discharge  
10 profiles of  $\text{NM}_{1.2}\text{T}_{0.8}\text{P}/\text{HC}$  full cell at 0.2C.

1 After fully charged state, the full cell exhibits a potential of 3.77V. At 0.2C, the full  
 2 cell can deliver a specific capacity of 103.2 mAh g<sup>-1</sup>. After 20 cycles at 1C, the full  
 3 cells can retain capacity retention of 76.1%. The hard carbon anode was directly  
 4 purchased from BTR New Energy Materials Inc. Therefore, the anodes don't exhibit  
 5 superior property which may cause the poor performance of full cell.

6

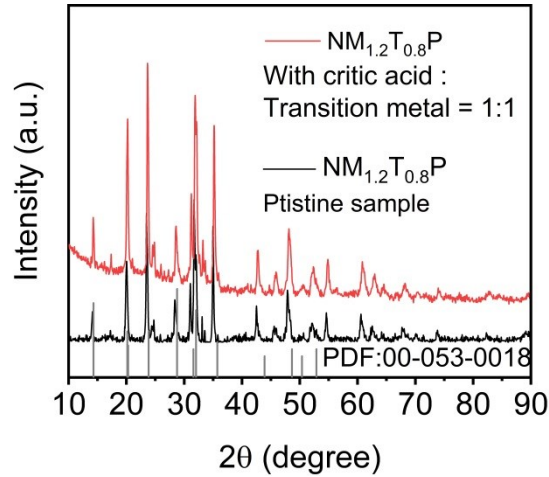

7

8 **Fig. S15.** The XRD pattern of NM<sub>1.2</sub>T<sub>0.8</sub>P with decreasing critical acid content during  
 9 synthesis process.

10

11 **Table S1.** ICP-OES chemical analysis results of NM<sub>1.2</sub>T<sub>0.8</sub>P

| Elements     | Na      | Mn      | Ti       |
|--------------|---------|---------|----------|
| W/W%         | 13.4387 | 12.1339 | 6.739457 |
| Atomic ratio | 4.17    | 1.57    | 1        |

12

13

14

15 **Table S2.** The fitted value of R<sub>ct</sub> from EIS

| Samples            | NMTP/C | NM <sub>1.15</sub> T <sub>0.85</sub> P/C | NM <sub>1.2</sub> T <sub>0.8</sub> P/C |
|--------------------|--------|------------------------------------------|----------------------------------------|
| R <sub>ct</sub> /Ω | 271.7  | 342.4                                    | 452.3                                  |

16

1

2

3

4

5 **Table S3.** The evaluated  $D_{\text{Na}^+}$  from CV curves.

| Sample                                                                     | Peak1                  | Peak2                  | Peak3                  | Peak4                  | Peak5                  | Peak6                  |
|----------------------------------------------------------------------------|------------------------|------------------------|------------------------|------------------------|------------------------|------------------------|
| NMTP/<br>$\text{cm}^2 \text{ s}^{-1}$                                      | $4.27 \times 10^{-10}$ | $7.23 \times 10^{-11}$ | $8.0 \times 10^{-11}$  | $9.5 \times 10^{-11}$  | $5.05 \times 10^{-11}$ | $3.92 \times 10^{-11}$ |
| $\text{NM}_{1.15}\text{T}_{0.85}\text{P}/$<br>$\text{cm}^2 \text{ s}^{-1}$ | $2.59 \times 10^{-10}$ | $8.55 \times 10^{-11}$ | $1.46 \times 10^{-10}$ | $2.11 \times 10^{-10}$ | $8.16 \times 10^{-11}$ | $2.0 \times 10^{-10}$  |
| $\text{NM}_{1.2}\text{T}_{0.8}\text{P}/$<br>$\text{cm}^2 \text{ s}^{-1}$   | $5.83 \times 10^{-11}$ | $6.02 \times 10^{-11}$ | $1.07 \times 10^{-10}$ | $8.32 \times 10^{-11}$ | $5.1 \times 10^{-11}$  | $5.23 \times 10^{-11}$ |

6

7

8

9

10 **Table S4.** The fitted lattice parameters of various samples based on Rietveld  
11 refinement.

| Sample                                    | $a/\text{\AA}$ | $c/\text{\AA}$ | Volume/ $\text{\AA}^3$ |
|-------------------------------------------|----------------|----------------|------------------------|
| NMTP                                      | 8.80           | 21.76          | 1460.2                 |
| $\text{NM}_{1.15}\text{T}_{0.85}\text{P}$ | 8.86           | 21.64          | 1472.2                 |
| $\text{NM}_{1.2}\text{T}_{0.8}\text{P}$   | 8.90           | 21.83          | 1498.2                 |
| $\text{NM}_{1.3}\text{T}_{0.7}\text{P}$   | 8.90           | 21.98          | 1508.2                 |

12

13

1 **Table S5.** The energy density comparison with reported various cathode materials for  
 2 SIBs.

| Sample                                                                       | Current density<br>mA/g | Specific<br>capacity<br>mAh/g | Energy<br>density<br>Wh/kg | Reference         |
|------------------------------------------------------------------------------|-------------------------|-------------------------------|----------------------------|-------------------|
| $\text{NM}_{1.15}\text{T}_{0.85}\text{P}$                                    | 15                      | 181.4                         | 560.2                      | This work         |
| $\text{NM}_{1.2}\text{T}_{0.8}\text{P}$                                      | 15                      | 176.1                         | 539.5                      | This work         |
| $\text{Na}_3\text{MnTi}(\text{PO}_4)_3$                                      | 15                      | 160.3                         | 442                        | This work         |
| $\text{Na}_4\text{MnCr}(\text{PO}_4)_3$                                      | 5.5                     | 131                           | 470                        | Ref <sup>2</sup>  |
| $\text{Na}_4\text{Fe}_3(\text{PO}_4)_2(\text{P}_2\text{O}_7)$                | 12.9                    | 128                           | 357.5                      | Ref <sup>3</sup>  |
| $\text{Na}_3\text{MnTi}(\text{PO}_4)_3$                                      | 23.4                    | 114                           | 410                        | Ref <sup>4</sup>  |
| $\text{Na}_3\text{V}_2(\text{PO}_4)_3$                                       | 58.8                    | 116.3                         | 382.9                      | Ref <sup>5</sup>  |
| $\text{Na}_4\text{MnCr}(\text{PO}_4)_3$                                      | 16                      | 160.5                         | 566.5                      | Ref <sup>6</sup>  |
| $\text{Na}_3\text{V}_2(\text{PO}_4)_2\text{F}_3$                             | 128                     | 119.9                         | 446.4                      | Ref <sup>7</sup>  |
| $\text{Na}_4\text{MnV}(\text{PO}_4)_3$                                       | 55                      | 109.8                         | 380                        | Ref <sup>8</sup>  |
| $\text{Na}_{3.5}\text{Mn}_{0.5}\text{V}_{1.5}(\text{PO}_4)_3$                | 110                     | 109.1                         | 373.5                      | Ref <sup>9</sup>  |
| $\text{Na}_4\text{Mn}_2\text{Co}(\text{PO}_4)_2\text{P}_2\text{O}_7$         | 12.9                    | 96.1                          | 371                        | Ref <sup>10</sup> |
| $\text{Na}_{3.1}\text{Fe}_4[\text{Fe}(\text{CN})_6]_3$                       | 12                      | 123                           | 344                        | Ref <sup>11</sup> |
| $\text{Na}_{0.78}\text{Ni}_{0.23}\text{Mn}_{0.69}\text{O}_2$                 | 12.1                    | 138                           | 448.5                      | Ref <sup>12</sup> |
| $\text{Na}_{0.75}\text{Ni}_{0.82}\text{Co}_{0.12}\text{Mn}_{0.06}\text{O}_2$ | 20                      | 171                           | 478.8                      | Ref <sup>13</sup> |
| $\text{Na}_3\text{V}_{2-x}\text{Fe}_x(\text{PO}_4)_2\text{F}_3$              | 12.8                    | 118                           | 433                        | Ref <sup>14</sup> |

3  
 4  
 5  
 6  
 7

1 **Table S6.** Detailed structural information of NMTP derived from Rietveld refinement

2

| space group = R-3c        |          | $R_p = 4.86\%$             |          | $R_{wp} = 6.25\%$           |           |          |
|---------------------------|----------|----------------------------|----------|-----------------------------|-----------|----------|
| $a (\text{Å}) = 8.801568$ |          | $c (\text{Å}) = 21.765656$ |          | $\alpha (^\circ) = 90$      |           |          |
| $\beta (^\circ) = 90$     |          | $\gamma (^\circ) = 120$    |          | $V (\text{Å}^3) = 1460.234$ |           |          |
| Atom                      | x        | y                          | z        | Mult                        | Occupancy | Uiso     |
| Na1                       | 0.000000 | 0.000000                   | 0.000000 | 6                           | 0.8830    | 0.165000 |
| Na2                       | 0.639149 | 0.000000                   | 0.250000 | 18                          | 0.6984    | 0.007700 |
| Mn                        | 0.000000 | 0.000000                   | 0.149350 | 12                          | 0.5000    | 0.040591 |
| Ti                        | 0.000000 | 0.000000                   | 0.149350 | 12                          | 0.5000    | 0.071422 |
| P                         | 0.298300 | 0.000000                   | 0.250000 | 18                          | 1.0000    | 0.031300 |
| O1                        | 0.186680 | 0.176844                   | 0.079159 | 36                          | 1.0000    | 0.008812 |
| O2                        | 0.026290 | 0.205683                   | 0.195142 | 36                          | 1.0000    | 0.035081 |

3

4 **Table S7.** Detailed structural information of  $\text{NM}_{1.15}\text{T}_{0.85}\text{P}$  derived from Rietveld

5 refinement

| space group = R-3c        |          | $R_p = 4.80\%$             |          | $R_{wp} = 6.16\%$           |           |          |
|---------------------------|----------|----------------------------|----------|-----------------------------|-----------|----------|
| $a (\text{Å}) = 8.863012$ |          | $c (\text{Å}) = 21.641275$ |          | $\alpha (^\circ) = 90$      |           |          |
| $\beta (^\circ) = 90$     |          | $\gamma (^\circ) = 120$    |          | $V (\text{Å}^3) = 1472.283$ |           |          |
| Atom                      | x        | y                          | z        | Mult                        | Occupancy | Uiso     |
| Na1                       | 0.000000 | 0.000000                   | 0.000000 | 6                           | 0.8909    | 0.019783 |
| Na2                       | 0.642032 | 0.000000                   | 0.250000 | 18                          | 0.7838    | 0.039920 |
| Mn                        | 0.000000 | 0.000000                   | 0.149406 | 12                          | 0.5750    | 0.022073 |
| Ti                        | 0.000000 | 0.000000                   | 0.149406 | 12                          | 0.4250    | 0.053507 |
| P                         | 0.298300 | 0.000000                   | 0.250000 | 18                          | 1.000     | 0.022137 |
| O1                        | 0.186680 | 0.176844                   | 0.079159 | 36                          | 1.000     | 0.08238  |
| O2                        | 0.026290 | 0.205683                   | 0.195142 | 36                          | 1.000     | 0.00676  |

6

7

1 **Table S8.** Detailed structural information of  $\text{NM}_{1.2}\text{T}_{0.8}\text{P}$  derived from Rietveld  
 2 refinement

| space group = R-3c        |          |                            |          |                             |           |         |
|---------------------------|----------|----------------------------|----------|-----------------------------|-----------|---------|
|                           |          | $R_p = 5.16\%$             |          | $R_{wp} = 6.80\%$           |           |         |
| $a (\text{Å}) = 8.902052$ |          | $c (\text{Å}) = 21.831387$ |          | $\alpha (^\circ) = 90$      |           |         |
| $\beta (^\circ) = 90$     |          | $\gamma (^\circ) = 120$    |          | $V (\text{Å}^3) = 1498.208$ |           |         |
| Atom                      | x        | y                          | z        | Mult                        | Occupancy | Uiso    |
| Na1                       | 0.000000 | 0.000000                   | 0.000000 | 6                           | 0.9120    | 0.00622 |
| Na2                       | 0.642032 | 0.000000                   | 0.250000 | 18                          | 0.7053    | 0.02630 |
| Mn                        | 0.000000 | 0.000000                   | 0.148938 | 12                          | 0.6000    | 0.06436 |
| Ti                        | 0.000000 | 0.000000                   | 0.148938 | 12                          | 0.4000    | 0.00054 |
| P                         | 0.298300 | 0.000000                   | 0.250000 | 18                          | 1.000     | 0.03838 |
| O1                        | 0.186680 | 0.176844                   | 0.079159 | 36                          | 1.000     | 0.02210 |
| O2                        | 0.026290 | 0.205683                   | 0.195142 | 36                          | 1.000     | 0.06329 |

3

4 **Table S9.** Detailed structural information of  $\text{NM}_{1.3}\text{T}_{0.7}\text{P}$  derived from Rietveld  
 5 refinement

6

| space group = R-3c     |          |                         |          |                             |           |         |
|------------------------|----------|-------------------------|----------|-----------------------------|-----------|---------|
|                        |          | $R_p = 6.03\%$          |          | $R_{wp} = 8.36\%$           |           |         |
| $a (\text{Å}) = 8.900$ |          | $c (\text{Å}) = 21.982$ |          | $\alpha (^\circ) = 90$      |           |         |
| $\beta (^\circ) = 90$  |          | $\gamma (^\circ) = 120$ |          | $V (\text{Å}^3) = 1508.200$ |           |         |
| Atom                   | x        | y                       | z        | Mult                        | Occupancy | Uiso    |
| Na1                    | 0.000000 | 0.000000                | 0.000000 | 6                           | 0.9432    | 0.00622 |
| Na2                    | 0.642032 | 0.000000                | 0.250000 | 18                          | 0.8800    | 0.02630 |
| Mn                     | 0.000000 | 0.000000                | 0.149350 | 12                          | 0.650     | 0.01125 |
| Ti                     | 0.000000 | 0.000000                | 0.149350 | 12                          | 0.350     | 0.00896 |
| P                      | 0.298300 | 0.000000                | 0.250000 | 18                          | 1.000     | 0.03130 |
| O1                     | 0.186680 | 0.176844                | 0.079159 | 36                          | 1.000     | 0.03290 |
| O2                     | 0.026290 | 0.205683                | 0.195142 | 36                          | 1.000     | 0.02600 |

1 **Table S10.** The sodium storage performance comparison with reported NMTP.

2

| Sample                                 | Specific Capacity/<br>mAh g <sup>-1</sup> | ICE  | Reaction electron number | Energy density<br>Wh kg <sup>-1</sup> | Reference         |
|----------------------------------------|-------------------------------------------|------|--------------------------|---------------------------------------|-------------------|
| NMTP/C                                 | 80                                        | 70%  | 2                        | -                                     | Ref <sup>15</sup> |
| NMTP/C@rGO                             | 114                                       | -    | 2                        | 410                                   | Ref <sup>4</sup>  |
| NMTP/C                                 | 173                                       | -    | 3                        | -                                     | Ref <sup>1</sup>  |
| rGO@NMTP-C                             | 173                                       | -    | 3                        | Over 500                              | Ref <sup>16</sup> |
| NM <sub>1.2</sub> T <sub>0.8</sub>     | 176                                       | 91.8 | 3.07                     | 539                                   | This work         |
| NM <sub>1.15</sub> T <sub>0.85</sub> P | 181.4                                     | 80.3 | 3.13                     | 560                                   | This work         |

3

4 **Table S11.** The lattice parameters comparison with reported NMTP.

| Material | a (Å)    | c (Å)     | V (Å <sup>3</sup> ) | Reference         |
|----------|----------|-----------|---------------------|-------------------|
| NMTP     | 8.801568 | 21.765656 | 1460.234            | This work         |
| NMTP     | 8.82621  | 21.72350  | 1465.578            | Ref <sup>16</sup> |
| NMTP     | 8.8343   | 21.6654   | 1464.35             | Ref <sup>1</sup>  |

5

6

## 1 References:

- 2 1. T. Zhu, P. Hu, X. Wang, Z. Liu, W. Luo, K. A. Owusu, W. Cao, C. Shi, J. Li,  
3 L. Zhou and L. Mai, *Adv. Energy Mater.* , 2019, **9**, 1803436.
- 4 2. J. Wang, Y. Wang, D. H. Seo, T. Shi, S. Chen, Y. Tian, H. Kim and G. Ceder,  
5 *Adv. Energy Mater.* , 2020, **10**, 1903968.
- 6 3. T. Yuan, Y. Wang, J. Zhang, X. Pu, X. Ai, Z. Chen, H. Yang and Y. Cao,  
7 *Nano Energy*, 2019, **56**, 160-168.
- 8 4. T. Zhu, P. Hu, C. Cai, Z. Liu, G. Hu, Q. Kuang, L. Mai and L. Zhou, *Nano*  
9 *Energy*, 2020, **70**, 104548.
- 10 5. X. Cao, A. Pan, B. Yin, G. Fang, Y. Wang, X. Kong, T. Zhu, J. Zhou, G. Cao  
11 and S. Liang, *Nano Energy*, 2019, **60**, 312-323.
- 12 6. J. Zhang, Y. Liu, X. Zhao, L. He, H. Liu, Y. Song, S. Sun, Q. Li, X. Xing and  
13 J. Chen, *Adv. Mater.*, 2020, **32**, 1906348.
- 14 7. L. Deng, F.-D. Yu, Y. Xia, Y.-S. Jiang, X.-L. Sui, L. Zhao, X.-H. Meng, L.-F.  
15 Que and Z.-B. Wang, *Nano Energy*, 2021, **82**, 105659.
- 16 8. H. Li, T. Jin, X. Chen, Y. Lai, Z. Zhang, W. Bao and L. Jiao, *Adv. Energy*  
17 *Mater.* , 2018, **8**, 1801418.
- 18 9. J. Zhang, X. Zhao, Y. Song, Q. Li, Y. Liu, J. Chen and X. Xing, *Energy*  
19 *Storage Materials*, 2019, **23**, 25-34.
- 20 10. L. Tang, X. Liu, Z. Li, X. Pu, J. Zhang, Q. Xu, H. Liu, Y. G. Wang and Y. Xia,  
21 *ACS Appl. Mater. Interfaces*, 2019, **11**, 27813-27822.
- 22 11. W. Ren, Z. Zhu, M. Qin, S. Chen, X. Yao, Q. Li, X. Xu, Q. Wei, L. Mai and C.  
23 Zhao, *Adv. Funct. Mater.*, 2019, **29**.
- 24 12. C. Ma, J. Alvarado, J. Xu, R. J. Clement, M. Kodur, W. Tong, C. P. Grey and  
25 Y. S. Meng, *J. Am. Chem. Soc.*, 2017, **139**, 4835-4845.
- 26 13. J. Yang, M. Tang, H. Liu, X. Chen, Z. Xu, J. Huang, Q. Su and Y. Xia, *Small*,  
27 2019, **15**, e1905311.
- 28 14. J. Y. Park, Y. Shim, Y.-i. Kim, Y. Choi, H. J. Lee, J. Park, J. E. Wang, Y. Lee,  
29 J. H. Chang, K. Yim, C. W. Ahn, C.-W. Lee, D. K. Kim and J. M. Yuk, *J.*  
30 *Mater. Chem. A*, 2020, **8**, 20436-20445.
- 31 15. H. Gao, Y. Li, K. Park and J. B. Goodenough, *Chem. Mater.* , 2016, **28**, 6553-  
32 6559.
- 33 16. H. Li, M. Xu, C. Gao, W. Zhang, Z. Zhang, Y. Lai and L. Jiao, *Energy*  
34 *Storage Materials*, 2020, **26**, 325-333.

35
